# Supplementary material for: Sustainable synthesis of N-acetyllactosamine using an immobilized β-galactosidase on a tailor made porous polymer
Source: Royal Society of Chemistry journal article supplement (doi:10.1039/c5ra03527a), 2015-01-01
Supplement: c5ra03527a1.pdf [file c5ra03527a1.pdf]

## Supplementary Information

# Sustainable Synthesis of *N*-acetylactosamine using an Immobilized $\beta$ -Galactosidase on a Tailor Made Porous Polymer

Antonio Aires-Trapote,<sup>[a,b]</sup> Aitana Tamayo-Hernando,<sup>[c]</sup> Juan Rubio Alonso,<sup>[c]</sup> Angel Rumbero<sup>\*[b]</sup> and María J. Hernáiz<sup>\*[a]</sup>

<sup>a\*</sup> Department of Organic and Pharmaceutical Chemistry, Faculty of Pharmacy, Complutense University of Madrid, Plz. Ramón y Cajal s/n, 28040 Madrid, Spain. Fax: (+) 34 9139 41822. E-mail: mjhernai@ucm.es

<sup>b</sup> Department of Organic Chemistry, Faculty of Science, Autonoma University of Madrid, Campus de Cantoblanco.28049-Madrid

<sup>c</sup> Department of Chemistry Physics of Surfaces and Processes, Instituto de Cerámica y Vidrio (CSIC), Kelsen nº 5, 28049-Madrid. Spain.

### Table of contents

|                                                                 |    |
|-----------------------------------------------------------------|----|
| 1. Table S1.                                                    | S1 |
| Table S2. Pore volume distribution in poly-(AGE-co-DVB)-27      | S2 |
| 3. Figure S1 Thermo gravimetric analysis of poly(AGE-co-DVB)-27 | S3 |

**Table S1.** Copolymerization conditions and properties of poly(AGE-*co*-DVB)

| Entry           | Polymerization Conditions <sup>a</sup> |                         |                       |                        | Polymer Properties |                       |                   |                                     |
|-----------------|----------------------------------------|-------------------------|-----------------------|------------------------|--------------------|-----------------------|-------------------|-------------------------------------|
|                 | Monomer<br>(% AGE)                     | Cross-linker<br>(% DVB) | Initiator<br>(% AIBN) | T <sup>a</sup><br>(°C) | Yield<br>(%)       | Pore volume<br>(mL/g) | Pore size<br>(nm) | Surface area<br>(m <sup>2</sup> /g) |
| 1               | 50                                     | 50                      | 1                     | 70                     | 55                 | 1.3                   | 12                | 489                                 |
| 2               | 50                                     | 50                      | 5                     | 70                     | 59                 | 1.1                   | 11                | 449                                 |
| 3               | 50                                     | 50                      | 1                     | 90                     | 51                 | 1.6                   | 9                 | 790                                 |
| 4               | 50                                     | 50                      | 5                     | 90                     | 56                 | 1.9                   | 12                | 682                                 |
| 5               | 50                                     | 50                      | 1                     | 120                    | 50                 | 1.6                   | 9                 | 795                                 |
| 6               | 50                                     | 50                      | 5                     | 120                    | 54                 | 1.8                   | 11                | 690                                 |
| 7               | 60                                     | 40                      | 1                     | 70                     | 43                 | 1.5                   | 9                 | 746                                 |
| 8               | 60                                     | 40                      | 5                     | 70                     | 47                 | 1.4                   | 11                | 583                                 |
| 9               | 60                                     | 40                      | 10                    | 70                     | 50                 | 1.4                   | 12                | 470                                 |
| 10              | 60                                     | 40                      | 15                    | 70                     | 51                 | 1.7                   | 14                | 540                                 |
| 11              | 60                                     | 40                      | 1                     | 90                     | 56                 | 2.1                   | 12                | 794                                 |
| 12              | 60                                     | 40                      | 5                     | 90                     | 46                 | 1.7                   | 12                | 631                                 |
| 13              | 60                                     | 40                      | 10                    | 90                     | 48                 | 1.1                   | 9                 | 511                                 |
| 14              | 60                                     | 40                      | 15                    | 90                     | 48                 | 0.9                   | 8                 | 485                                 |
| 15              | 60                                     | 40                      | 1                     | 120                    | 47                 | 1.4                   | 10                | 594                                 |
| 16              | 60                                     | 40                      | 5                     | 120                    | 46                 | 0.3                   | 4                 | 433                                 |
| 17              | 70                                     | 30                      | 1                     | 70                     | 32                 | 1.6                   | 9                 | 804                                 |
| 18              | 70                                     | 30                      | 5                     | 70                     | 38                 | 1.9                   | 14                | 563                                 |
| 19              | 70                                     | 30                      | 10                    | 70                     | 40                 | 2.1                   | 14                | 482                                 |
| 20              | 70                                     | 30                      | 15                    | 70                     | 40                 | 1.6                   | 15                | 473                                 |
| 21              | 70                                     | 30                      | 1                     | 90                     | 34                 | 1.8                   | 11                | 709                                 |
| 22              | 70                                     | 30                      | 5                     | 90                     | 35                 | 1.4                   | 9                 | 701                                 |
| 23              | 80                                     | 20                      | 5                     | 70                     | 27                 | 1.8                   | 14                | 530                                 |
| 24              | 80                                     | 20                      | 10                    | 70                     | 31                 | 1.6                   | 16                | 433                                 |
| 25              | 80                                     | 20                      | 15                    | 70                     | 30                 | 0.9                   | 13                | 290                                 |
| 26 <sup>b</sup> | 60                                     | 40                      | 15                    | 70                     | 53                 | 0.8                   | 16                | 216                                 |
| 27 <sup>b</sup> | 70                                     | 30                      | 5                     | 70                     | 42                 | 0.6                   | 25                | 97                                  |
| 28 <sup>b</sup> | 80                                     | 20                      | 10                    | 70                     | 27                 | 1.2                   | 19                | 272                                 |

<sup>[a]</sup>General reaction conditions: polymerization mixture (AGE+DVB) 40%, cyclohexanol 60%.<sup>[b]</sup>Tween 80 (30% respect polymerization mixture)

**Table S2.** Pore volume distribution in poly-(AGE-*co*-DVB)-27.

| <b>Radius (nm)</b>               | <5   | 5-10 | 10-15 | 15-20 | 20-30 | 30-50 | 50-100 | >100  |
|----------------------------------|------|------|-------|-------|-------|-------|--------|-------|
| Pore Volume Distribution (vol %) | 3.32 | 4.52 | 5.35  | 5.73  | 9.43  | 20.30 | 50.52  | 17.13 |

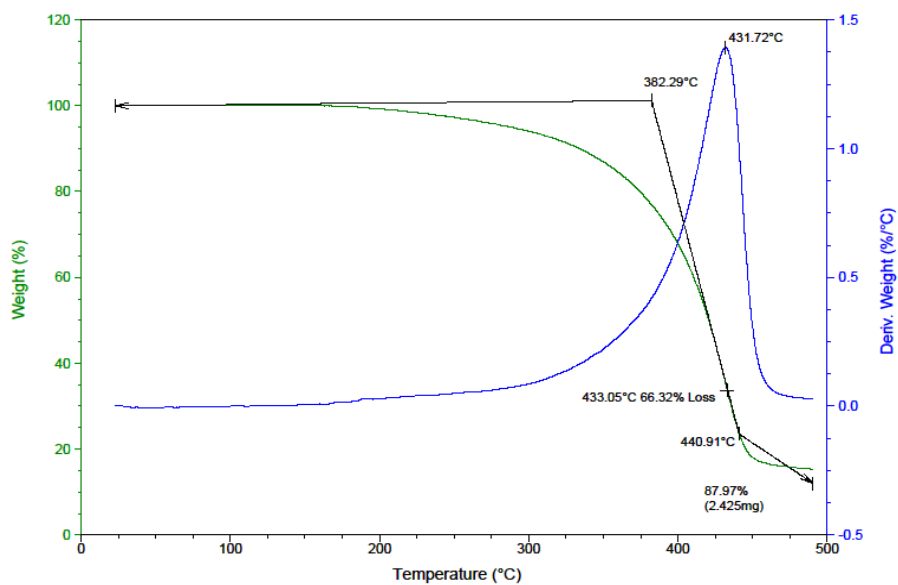

**Figure S1.** Thermo gravimetric analysis of poly(AGE-co-DVB)-27.
